# Supplementary material for: Heme Oxygenase 1‐Targeted Hybrid Nanoparticle for Chemo‐ and Immuno‐Combination Therapy in Acute Myelogenous Leukemia
Source: PubMed Central journal article supplement (PMC7341080; doi:10.1002/advs.202000487), 2020-06-03
Supplement: ADVS-7-2000487-s001.pdf [file ADVS-7-2000487-s001.pdf]

## **Supporting Information**

### **Heme Oxygenase 1-targeted Hybrid Nanoparticle for Chemo- and Immuno- Combination Therapy in Acute Myelogenous Leukemia**

*Seok-Beom Yong, Jaehyun Kim, Jee Young Chung, Sehee Ra, Seong Su Kim,*

*Yong-Hee Kim\**

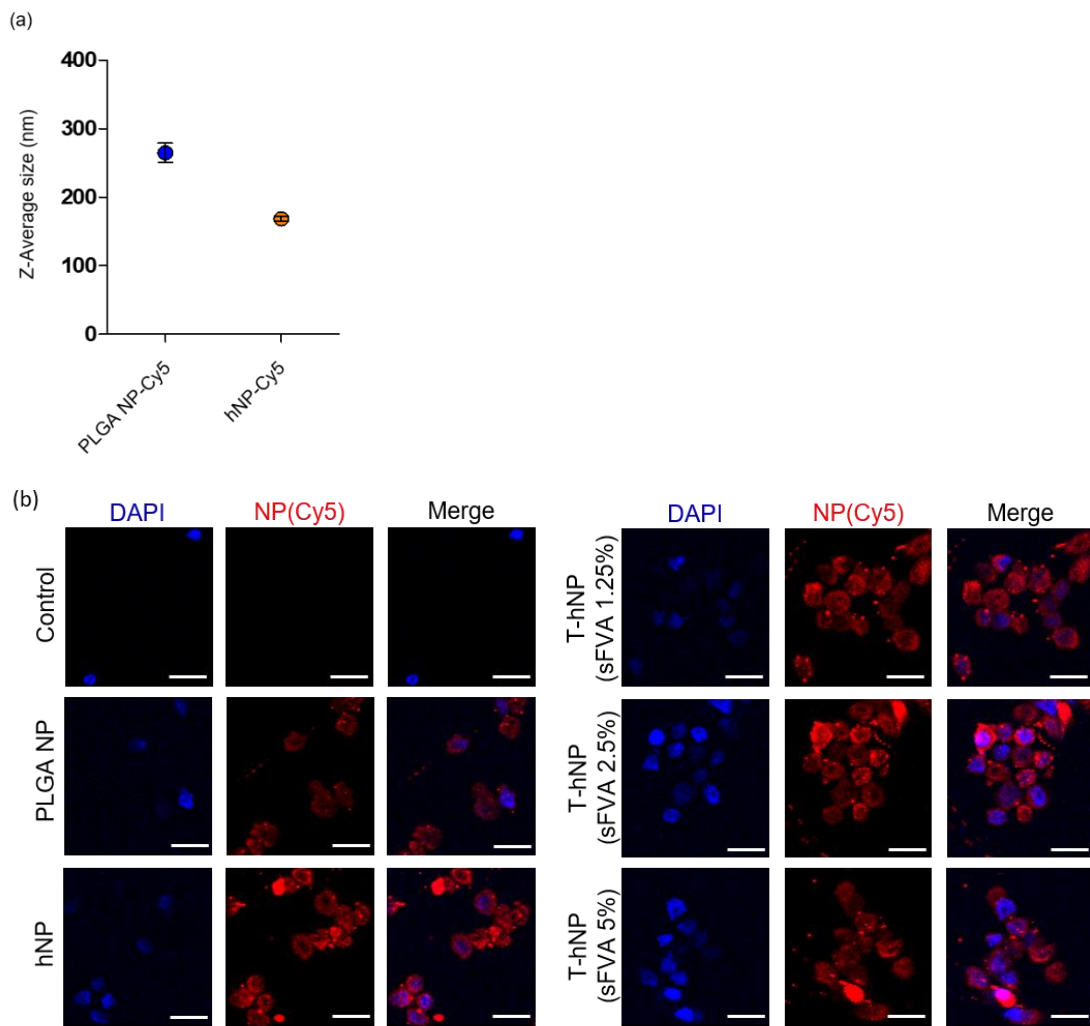

**Supplementary Figure 1. Preparation of Cy5-loaded lipid-polymer hybrid nanoparticle (hNP-Cy5) & confocal microscopy image for cellular uptake study.**

(a) Dynamic Light Scattering analysis of Cy5-loaded PLGA nanoparticle and -hybrid nanoparticle. (b) Confocal microscopy image for cellular uptake of hNP with/without sFVA. (particle concentration: 5  $\mu\text{g/ml}$ , Scale bar: 20  $\mu\text{m}$ )

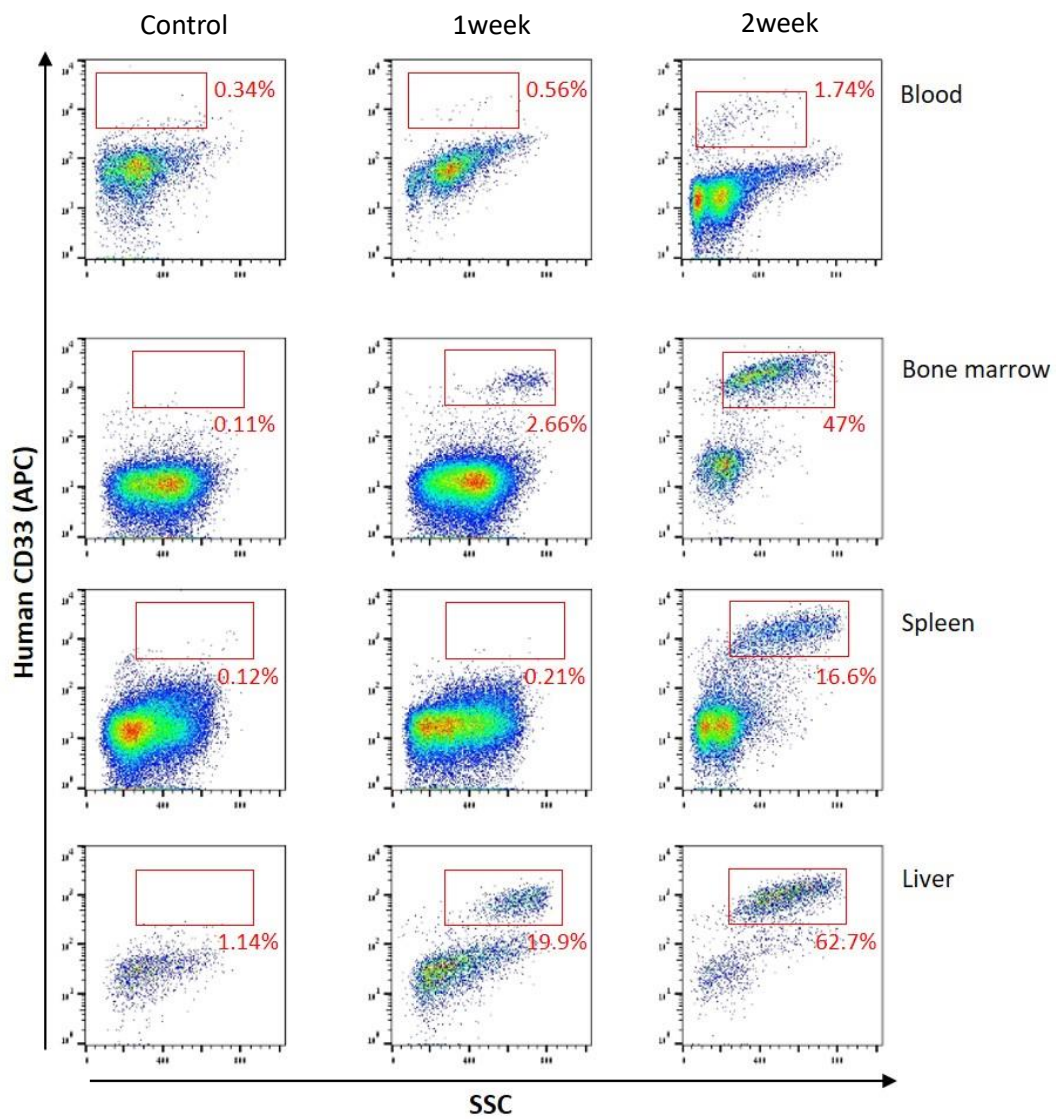

**Supplementary Figure 2. Organ distribution of intravenously injected U937 cell.**

(a) Flow cytometric analysis of human CD33+ U937 accumulation in leukemia niche organs. Control ;Left row, 1week after cell infusion; middle row, 2weeks after cell infusion; right row.

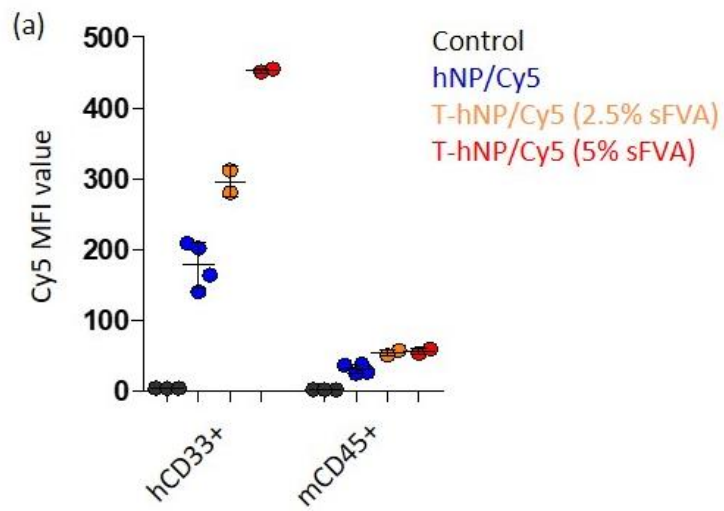

**Supplementary Figure 3. Bone marrow U937-targeted delivery of hNP & T-hNP.**

(a) Bone marrow cells were harvested from tibia and femur for cellular uptake analysis. Human CD33+ U937 and mouse CD45+ immune cells were analyzed for hNP and T-hNP internalization.

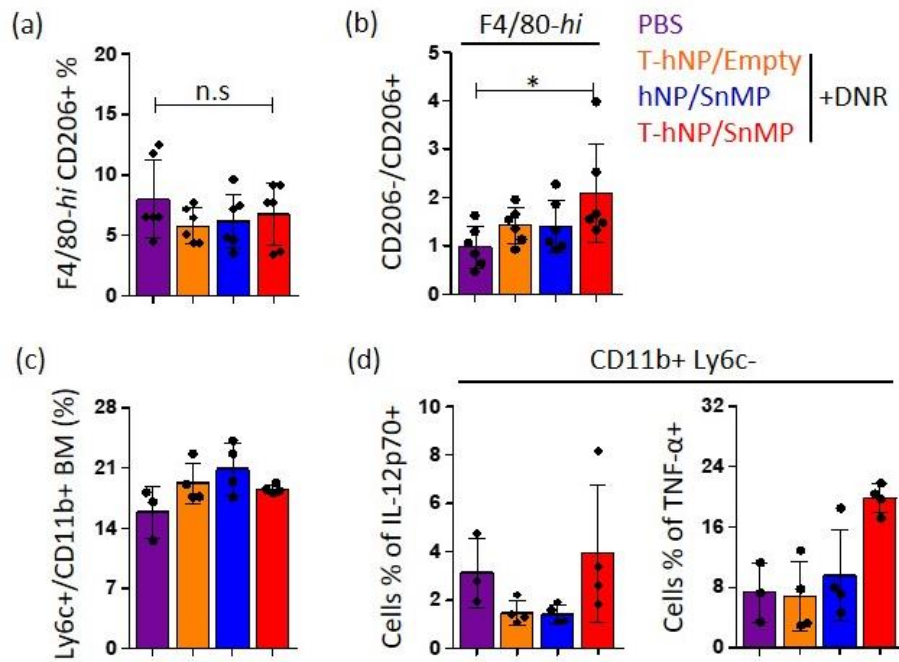

**Supplementary Figure 4. Ly6c+ monocytes & Ly6c- myeloid cell analysis in bone marrow.**

(a) Cells % of F4/80-hi, CD206+ M2-like macrophage in total bone marrow myeloid cells. (b) The ratio of CD206- M1-like macrophage to CD206+ M2-like macrophage in bone marrow myeloid cells. (c) Ly6c+ cells % to total CD11b+ bone marrow cells. (d) intracellular cytokine expressions in CD11b+ Ly6c- bone marrow myeloid cells.

**Table 1. List of antibodies**

| Target              | Clone name | Conjugate         |
|---------------------|------------|-------------------|
| Human CD33          | WM53       | PE, APC           |
| Human CCR2          | 48607      | PE, Biotin        |
| Human CD64          | M22, 10.1  | FITC, PerCP-Cy5.5 |
| Mouse CD11b         | M1/70      | FITC, PE          |
| Mouse CD45          | 30-F11     | FITC, PerCP-Cy5.5 |
| Mouse F4/80         | BM8        | PerCP-Cy5.5       |
| Mouse CD206         | MR5D3      | APC               |
| Mouse Ly6c          | AL-21      | PE                |
| Mouse Gr1           | RB6-8C5    | FITC              |
| Mouse TNF- $\alpha$ | MP6-XT22   | APC               |
| Mouse IL12p70       | C15.6      | APC               |
| Rat IgG1 Isotype    | R3-34      | APC               |
| Mouse CD16/32       | 2.4G2      | -                 |
